# Supplementary material for: Rhizobium Inoculation Improved the Rhizosphere P Dynamics and P Uptake Capacity of Pigeon Pea Plants Grown in Strongly Weathered Soil Only under P Fertilized Conditions
Source: MDPI journal article supplement (doi:10.3390/agronomy12123149), 2022-12-12
Supplement: s1 [file s1]

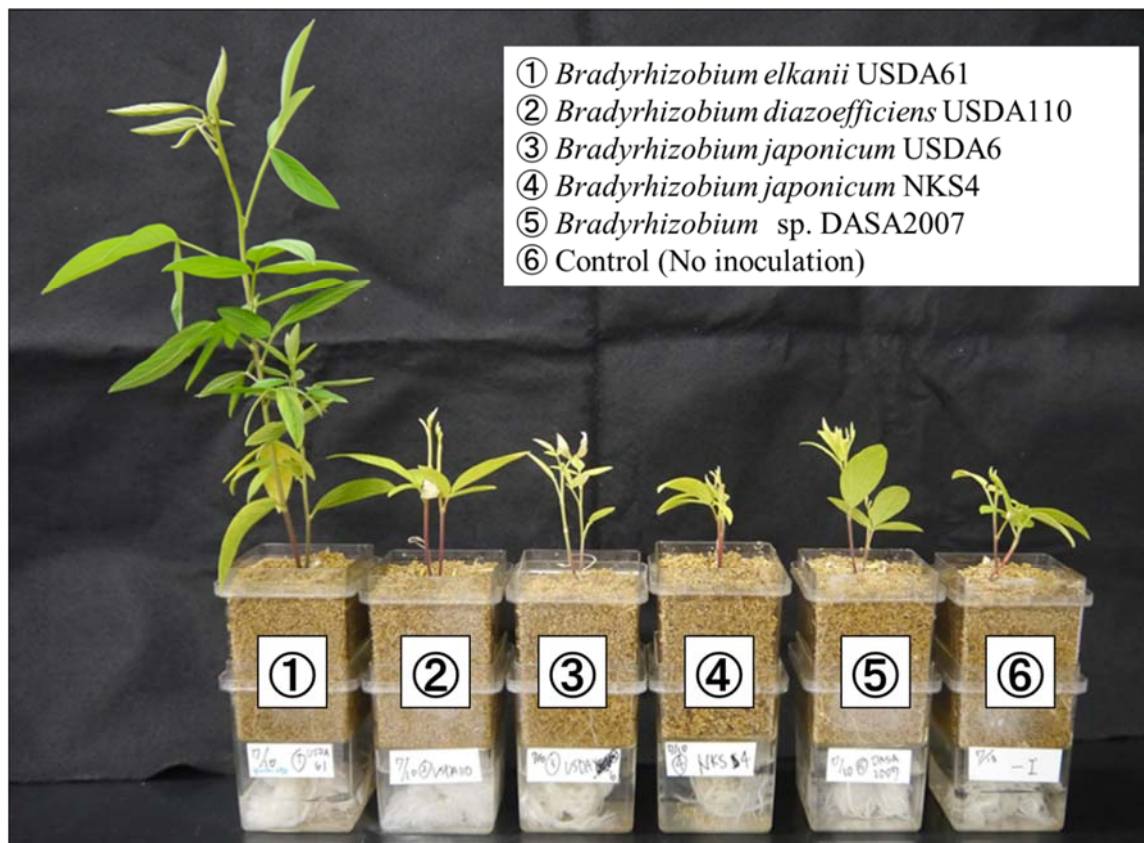

**Figure S1.** The condition at harvest (screening tests for selection of *Bradyrhizobium* inoculant by 30 days pot experiment).

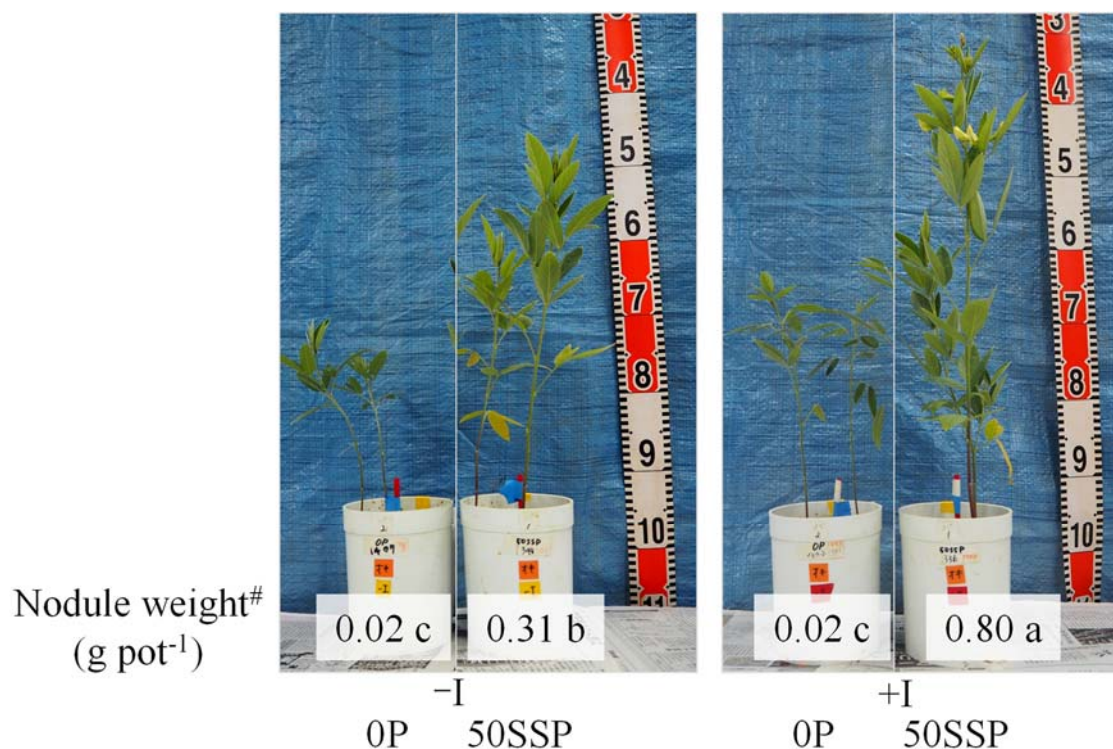

**Figure S2.** Plant condition at harvest and the total weight of *rhizobium* root nodules.

-I/+I and 0P/50SSP indicate *Rhizobium* inoculation and P fertilization.

#; The values in the photo indicate the total weight of *rhizobium* root nodules in each pot (g pot<sup>-1</sup>; the fresh weight). Lowercase letters indicate significant differences in the total weight of *rhizobium* root nodules between the treatments, according to Tukey's posthoc test ( $p < 0.05$ ).

**Table S1.** Plant P and N concentration after pot experiment.

|       |    | P concentration<br>(mg P g <sup>-1</sup> ) |          |          | N concentration<br>(mg N g <sup>-1</sup> ) |         |       |
|-------|----|--------------------------------------------|----------|----------|--------------------------------------------|---------|-------|
|       |    | Leaf                                       | Stem     | Root     | Leaf                                       | Stem    | Root  |
| 0P    | -I | 3.86                                       | 2.20     | 4.18     | 42.3                                       | 27.7    | 26.6  |
|       |    | (0.06) *                                   | (0.20) * | (1.54)   | (1.2)                                      | (2.1)   | (1.7) |
|       | +I | 3.58                                       | 1.63     | 2.39     | 44.5                                       | 28.4    | 30.2  |
|       |    | (0.05)                                     | (0.10)   | (0.14)   | (1.5)                                      | (1.0)   | (0.9) |
| 50SSP | -I | 3.91                                       | 2.06     | 3.52     | 27.1                                       | 13.8    | 18.6  |
|       |    | (0.25)                                     | (0.06) * | (0.21) * | (1.9)                                      | (1.0) * | (1.0) |
|       | +I | 3.51                                       | 1.71     | 2.86     | 24.3                                       | 10.1    | 16.5  |
|       |    | (0.11)                                     | (0.07)   | (0.05)   | (0.9)                                      | (0.5)   | (0.5) |

-I/+I indicate with or without *Rhizobium* inoculation and 0P/50SSP represent no P fertilization, respectively. Values in parentheses indicate the standard errors of the mean. Lowercase letters indicate the significant difference between the treatments, according to Tukey's posthoc test ( $p < 0.05$ ). \* indicates the significant difference between the -I and +I treatments under each P treatment, according to Student's t-test ( $p < 0.05$ ).

**Table S2.** Amount of fractionated and total soil P after the pot experiment

|    |       |             | Resin                        | NaHCO <sub>3</sub> |         | NaOH    |         | HCl     | Residual | Total   |
|----|-------|-------------|------------------------------|--------------------|---------|---------|---------|---------|----------|---------|
|    |       |             | -P                           | Pi                 | Po      | Pi      | Po      | -P      | -P       | P       |
|    |       |             | (mg P kg <sup>-1</sup> soil) |                    |         |         |         |         |          |         |
| -I | Ctrl  | bulk        | 6.2                          | 19.2               | 2.8     | 19.0    | 46.5    | 2.5     | 145.7    | 241.8   |
|    |       |             | (0.8)                        | (1.1)              | (0.0)   | (0.9)   | (2.1)   | (0.0)   | (1.8)    | (1.0)   |
|    | 0P    | bulk        | 4.7                          | 14.9               | 5.6     | 19.2    | 47.5    | 2.3     | 145.5    | 239.8   |
|    |       |             | (0.2)                        | (0.9)              | (0.8)   | (0.4)   | (2.2)   | (0.2)   | (4.1)    | (4.0)   |
|    |       | rhizosphere | 4.5                          | 15.9               | 7.0     | 19.4    | 52.4    | 2.3     | 157.8    | 261.0   |
|    |       |             | (0.3)                        | (0.4)              | (0.4)   | (1.0)   | (1.6)   | (0.2)   | (6.7)    | (5.1)   |
|    | 50SSP | bulk        | 9.1                          | 34.9               | 3.1     | 34.6    | 49.8    | 2.4     | 156.4    | 287.3   |
|    |       |             | (0.9)                        | (2.1)              | (0.7)   | * (2.0) | (1.8)   | * (0.0) | (14.3)   | (14.6)  |
|    |       | rhizosphere | 8.6                          | 30.9               | 7.3     | 30.0    | 57.4    | 2.3     | 145.6    | 282.0   |
|    |       |             | (0.6)                        | (0.7)              | (0.3)   | (0.8)   | (0.9)   | (0.2)   | (5.9)    | (4.6)   |
|    | +I    | 0P          | 5.0                          | 14.3               | 7.5     | 19.3    | 51.5    | 2.4     | 131.1    | 231.6   |
|    |       |             | (0.2)                        | (0.5)              | (1.3)   | (0.5)   | (1.2)   | (0.2)   | (7.3)    | (10.7)  |
|    |       | rhizosphere | 8.7                          | 16.5               | 8.9     | 19.3    | 55.2    | 2.2     | 157.0    | 267.8   |
|    |       |             | (3.2)                        | (1.0)              | (0.6)   | (0.7)   | (2.4)   | (0.2)   | (6.3)    | (4.2)   |
|    | 50SSP | bulk        | 12.1                         | 29.8               | 6.6     | 31.9    | 54.7    | 2.1     | 155.5    | 287.7   |
|    |       |             | (1.8)                        | (2.0)              | * (1.1) | * (0.9) | * (3.5) | (0.2)   | (3.4)    | * (1.7) |
|    |       | rhizosphere | 10.3                         | 46.1               | 10.1    | 45.9    | 62.2    | 2.2     | 186.2    | 371.7   |
|    |       |             | (1.2)                        | (4.9)              | (0.5)   | (4.9)   | (1.5)   | (0.2)   | (2.5)    | (7.6)   |

Ctrl, -I/+I, and 0P/50SSP indicate Control (No plant), *Rhizobium* inoculation, and P fertilization.

Values in parentheses indicate the standard errors of the mean. \* indicates the significant difference between the bulk soil and the rhizosphere soil in each treatment according to Student's t-test ( $p < 0.05$ ).

**Table S3.** The amount of organic acid per root.

|                                    |    | The amount of organic acid per root<br>(mg g <sup>-1</sup> ) |               |                  |                 |                |        |
|------------------------------------|----|--------------------------------------------------------------|---------------|------------------|-----------------|----------------|--------|
|                                    |    | Citric<br>acid                                               | Malic<br>acid | Succinic<br>acid | Malonic<br>acid | Oxalic<br>acid | Total  |
| 0P                                 | −I | 1.43                                                         | 0.77          | 0.83             | 0.39            | 0.15           | 3.49   |
|                                    |    | (0.30)                                                       | (0.17)        | (0.13)           | (0.04)          | (0.02)         | (0.66) |
|                                    | +I | 1.87                                                         | 0.76          | 0.67             | 0.26            | 0.18           | 3.73   |
|                                    |    | (0.49)                                                       | (0.21)        | (0.17)           | (0.08)          | (0.03)         | (0.96) |
| 50SSP                              | −I | 1.04                                                         | 0.52          | 0.53             | 0.35            | 0.11           | 2.39   |
|                                    |    | (0.10)                                                       | (0.05)        | (0.06)           | (0.05)          | (0.01)         | (0.24) |
|                                    | +I | 1.18                                                         | 0.59          | 0.53             | 0.47            | 0.14           | 2.85   |
|                                    |    | (0.27)                                                       | (0.16)        | (0.12)           | (0.12)          | (0.04)         | (0.70) |
| I <sub>noc</sub>                   |    | NS                                                           | NS            | NS               | NS              | NS             | NS     |
|                                    |    | 0.8                                                          | 0.0           | 0.5              | 0.1             | 1.5            | 0.3    |
| P <sub>fer</sub>                   |    | NS                                                           | NS            | NS               | NS              | NS             | NS     |
|                                    |    | 2.8                                                          | 1.6           | 3.1              | 0.5             | 2.0            | 2.1    |
| I <sub>noc</sub> ×P <sub>fer</sub> |    | NS                                                           | NS            | NS               | NS              | NS             | NS     |
|                                    |    | 0.2                                                          | 0.1           | 0.4              | 3.3             | 0.0            | 0.0    |

-I/+I and 0P/50SSP indicate *Rhizobium* inoculation and P fertilization. Values in parentheses indicate the standard errors of the mean. NS in the lower half tables indicates not significant by two-way ANOVA; I<sub>noc</sub> and P<sub>fer</sub> indicate the effect of *Rhizobium* inoculation and P fertilization, respectively. Values in the lower half table indicate F-value.

**Table S4.** The amount of organic acid per pot.

|                                    |    | The amount of organic acid per pot<br>(mg pot <sup>-1</sup> ) |                  |                  |                  |                  |                  |
|------------------------------------|----|---------------------------------------------------------------|------------------|------------------|------------------|------------------|------------------|
|                                    |    | Citric<br>acid                                                | Malic<br>acid    | Succinic<br>acid | Malonic<br>acid  | Oxalic<br>acid   | Total            |
| 0P                                 | −I | 1.30<br>(0.31)                                                | 0.71<br>(0.18)   | 0.78<br>(0.16)   | 0.35<br>(0.06)   | 0.13<br>(0.01)   | 3.20<br>(0.72) * |
|                                    | +I | 1.87<br>(0.16)                                                | 0.77<br>(0.11)   | 0.68<br>(0.05)   | 0.25<br>(0.04)   | 0.20<br>(0.03)   | 3.76<br>(0.35)   |
| 50SSP                              | −I | 2.29<br>(0.19) *                                              | 1.17<br>(0.15) * | 1.18<br>(0.13) * | 0.78<br>(0.11) * | 0.24<br>(0.02) * | 5.31<br>(0.58) * |
|                                    | +I | 5.17<br>(0.42)                                                | 2.48<br>(0.19)   | 2.31<br>(0.09)   | 2.05<br>(0.23)   | 0.49<br>(0.02)   | 12.31<br>(0.79)  |
| I <sub>noc</sub>                   |    | ***                                                           | ***              | ***              | ***              | ***              | ***              |
|                                    |    | 35                                                            | 17               | 19               | 22               | 54               | 36               |
| P <sub>fer</sub>                   |    | ***                                                           | ***              | ***              | ***              | ***              | ***              |
|                                    |    | 54                                                            | 44               | 76               | 59               | 83               | 71               |
| I <sub>noc</sub> ×P <sub>fer</sub> |    | **                                                            | **               | ***              | ***              | ***              | ***              |
|                                    |    | 17                                                            | 15               | 28               | 29               | 18               | 26               |

−I/+I and 0P/50SSP indicate *Rhizobium* inoculation and P fertilization. Values in parentheses indicate the standard errors of the mean. \* in the upper half tables indicates the significant difference between the −I and +I treatments according to Student's t-test ( $p < 0.05$ ). \*\* and \*\*\* in the lower half tables indicate  $p < 0.01$ , and  $p < 0.001$ , respectively, using two-way ANOVA; I<sub>noc</sub> and P<sub>fer</sub> indicate the effect of *Rhizobium* inoculation and P fertilization, respectively. Values in the lower half table indicate F value.

**Table S5.** pH after pot experiment.

|       |    | pH(H <sub>2</sub> O) |       |                |
|-------|----|----------------------|-------|----------------|
|       |    | bulk                 |       | rhizosphere    |
| 0P    | −I | 5.46<br>(0.01)       | — * — | 5.61<br>(0.02) |
|       | +I | 5.51<br>(0.03)       | — * — | 5.64<br>(0.03) |
| 50SSP | −I | 5.20<br>(0.01)       | — * — | 5.32<br>(0.04) |
|       | +I | 5.22<br>(0.03)       | — * — | 4.98<br>(0.03) |

−I/+I and 0P/50SSP indicate *Rhizobium* inoculation and P fertilization. Values in parentheses indicate the standard errors of the mean. \* indicates the significant difference between the bulk soil and the rhizosphere according to Student's t-test ( $p < 0.05$ ).
